# Supplementary figures and images for: Cross-synaptic synchrony and transmission of signal and noise across the mouse retina
Source: eLife journal article supplement (doi:10.7554/elife.03892), 2014-09-01

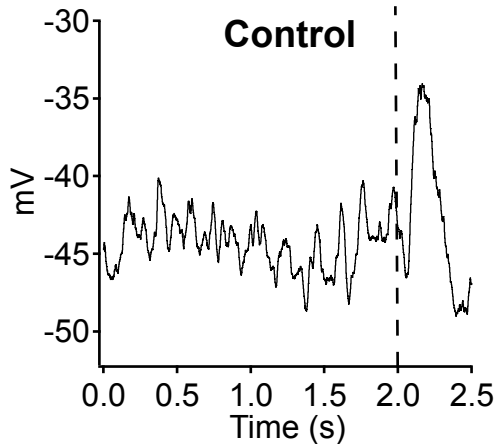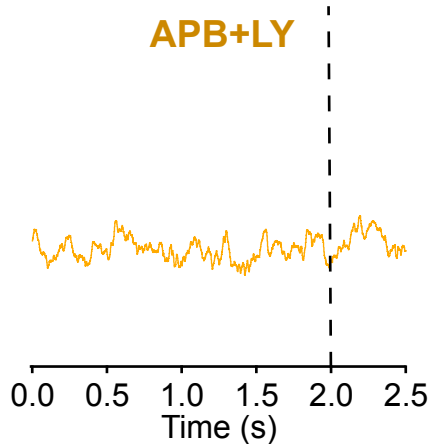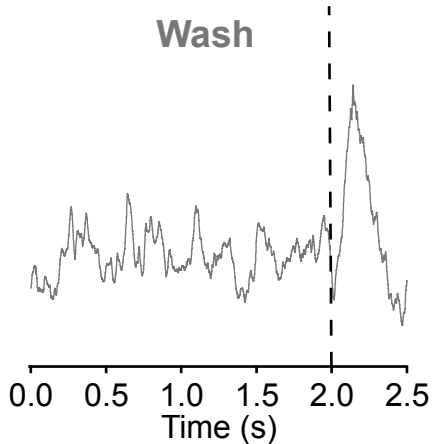

Supplement: supp [file elife-03892-supp-v1.zip]

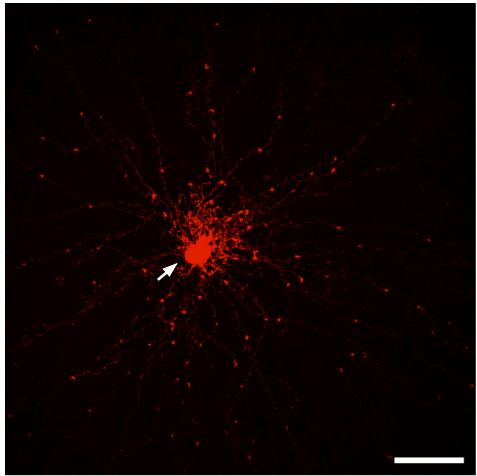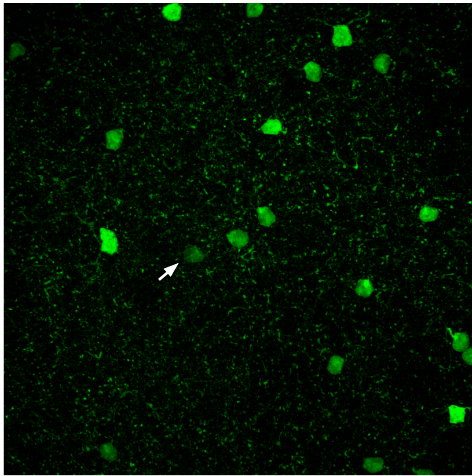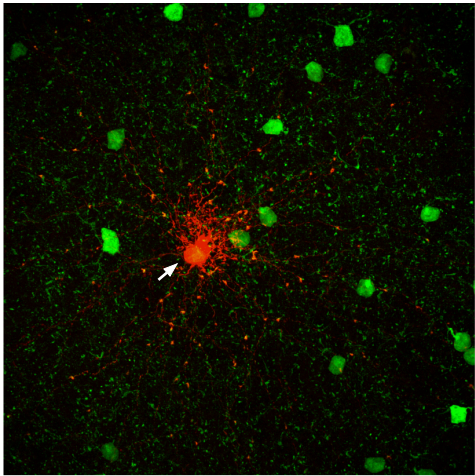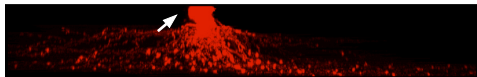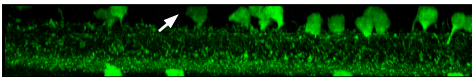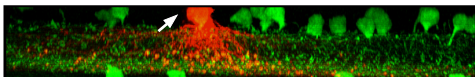

Supplement: supp [file elife-03892-supp-v1.zip]
